# Supplementary material for: Pharmacological profile of Ascaris suum ACR‐16, a new homomeric nicotinic acetylcholine receptor widely distributed in Ascaris tissues
Source: PubMed Central journal article supplement — Br J Pharmacol. 2016 Jul 18;173(16):2463–77. doi: 10.1111/bph.13524 (PMC4959957; doi:10.1111/bph.13524), 2016-07-18

# Figure 2S

Asu-ACR-16 : MSVQRAL-HYYL--CSQLL---HLYAVEGSEYHERRLYEDLNRDYNLNERPVANHSQPVTVYLVKVSLLQQLIDVDEKNCIVYVNAWLLYAW : 84  
 Tca-ACR-16 : MGLQRAFSNYCLI--SHLLI---HLCVAVHASYHERRLYEDLNRDYNLNERPVANHSQPVTVYLVKVSLLQQLIDVDEKNCIVYVNAWLLYAW : 85  
 Llo-ACR-16 : --MLQSWTNHSLVWCLHLHLFLFAFLQMITGSEYHERRLYEDLNRDYNLNERPVQNHSPVTVYLVKVSLLQQLIDVDEKNCIVYVNAWLLYAW : 88  
 Hco-ACR-16 : -----MWSLLIACSFVA----VAVVIAISYDERRLYEDLNRDYNLNERPVANHSKPVTVYLVKVSLLQQLIDVDEKNCIVYVNAWLLYAW : 78  
 Ace-ACR-16 : -----MRSLVVCCSLLA--ICILRCTSAS YHERRLYEDLNRDYNLNERPVANHSKPVTVYLVKVSLLQQLIDVDEKNCIVYVNAWLLYAW : 81  
 Cel-acr-16 : -----MSVCTLLISCALLA-----APTLSLQERRLYEDLNRDYNLNERPVANHSEPVTVVYLVKVALQQLIDVDEKNCIVYVNAWLLYAW : 79

### Cys-loop

Asu-ACR-16 : NDYKLRWDKKEYGNI TDVRF PAGR IWKPDVLLYNSVDANFDSTYPTNNVVYNTGDISWIPPGIFKISCKIDIRWFFPDEGRCPFKFGSWT : 174  
 Tca-ACR-16 : NDYKLRWDKKEYGNI TDVRF PAGR IWKPDVLLYNSVDANFDSTYPTNNVVYNTGDISWIPPGIFKISCKIDIRWFFPDEGRCPFKFGSWT : 175  
 Llo-ACR-16 : NDYKLRWDKTYGNI TDVRF PAGR IWKPDVLLYNSVDANFDSTYPTNNVVYNTGDISWIPPAIFKISCKINIRWFFPDEGRCPFKFGSWT : 178  
 Hco-ACR-16 : KDKYLVWVSEYGNITDVRFPAGR IWKPDVLLYNSVDANFDSTYPTNNVVYNTGDISWIPPGIFKISCKIDIRWFFPDEGRCPFKFGSWT : 168  
 Ace-ACR-16 : YDKYLVWVSEYGNITDVRFPAGR IWKPDVLLYNSVDANFDSTYPTNNVVYNTGDISWIPPGIFKISCKIDIRWFFPDEGRCPFKFGSWT : 171  
 Cel-acr-16 : NDYKLRWDKKEYGNI TDVRF PAGR IWKPDVLLYNSVDANFDSTYPTNNVVYNTGDISWIPPGIFKISCKIDIRWFFPDEGRCPFKFGSWT : 169

### YxCC

### TM1

Asu-ACR-16 : YDEKLDLQEGKGFEDI SEYMPSGEWALPMTVSRTEKFDYCCPEPYDLTFYVLMRRRTLYYGFNLIMPCILTTMTLLGFTLPPDAGE : 264  
 Tca-ACR-16 : YDEKLDLQEGKGFEDI SEYMPSGEWALPMTVSRTEKFDYCCPEPYDLTFYVLMRRRTLYYGFNLIMPCILTTMTLLGFTLPPDAGE : 265  
 Llo-ACR-16 : YDEKLDLQEGKGFEDI SEYMPSGEWALPMTVSRTEKFDYCCPEPYDLTFYVLMRRRTLYYGFNLIMPCILTTMTLLGFTLPPDAGE : 268  
 Hco-ACR-16 : YDEKLDLQEGKGFEDI SEYLPNGEWALPMTVSRTEKFDYCCPEPYDLTFYVLMRRRTLYYGFNLIMPCILTTMTLLGFTLPPDAGE : 258  
 Ace-ACR-16 : YDEKLDLQEGKGFEDI SEYLPNGEWALPMTVSRTEKFDYCCPEPYDLTFYVLMRRRTLYYGFNLIMPCILTTMTLLGFTLPPDAGE : 261  
 Cel-acr-16 : YDEKLDLQEGKGFEDI SEYISNGEWALPMTVSRTEKFDYCCPEPYDLTFYVLMRRRTLYYGFNLIMPCILTTMTLLGFTLPPDAGE : 259

### TM2

### TM3

Asu-ACR-16 : KITLQITVLLSICFFLSIVSEMSPTSEAVPLLGIFFSCCMIVVTASTVFTVYVNLHYRTPETHDMGITRTRLLLYWLEFYILRMRPQV : 354  
 Tca-ACR-16 : KITLQITVLLSICFFLSIVSEMSPTSEAVPLLGIFFSCCMIVVTASTVFTVYVNLHYRTPETHDMSTTRTRLLLYWLEFYILRMRPQV : 355  
 Llo-ACR-16 : KITLQITVLLSICFFLSIVSEMSPTSEAVPLLGIFFSCCMIVVTASTVFTVYVNLHYRTPETHDMGLTKRLLLYWLEFYILRMRPQV : 358  
 Hco-ACR-16 : KITLQITVLLSICFFLSIVSEMSPTSEAVPLLGIFFSCCMIVVTASTVFTVYVNLHYRTPETHDMTPVMSRLLLYWLEFYILRMRPQV : 348  
 Ace-ACR-16 : KITLQITVLLSICFFLSIVSEMSPTSEAVPLLGIFFSCCMIVVTASTVFTVYVNLHYRTPETHDMSATMRSLLLYWLEFYILRMRPQV : 351  
 Cel-acr-16 : KITLQITVLLSICFFLSIVSEMSPTSEAVPLLGIFFSCCMIVVTASTVFTVYVNLHYRTPETHDMGPWTRNLLLYWLEFYILRMRPQH : 349

Asu-ACR-16 : YLWQTLPLPLPCKSPKHSSELRINVDVPTGSSRSNSLDVERVHQM--SGLTNGTGAPMCTVNLGGPATVAGAPMLIGQQATLLVL : 441  
 Tca-ACR-16 : YLSWHTLPLPLPCKSPKHSSELRINVDVPTGSSRSNSLDVERVHQM--SGLTNGTGAPVCTVNLGAPAAIGGAPMLIGQQATLLVL : 443  
 Llo-ACR-16 : NLSWKTLPPLPLPCKSPKHSSELRINVDVPTGSSRSNSLDADQVCCQM--SGISNGK-SPISTVINGPTLSQTNSSMLIGQQATLLVL : 444  
 Hco-ACR-16 : KLTYPALPLPLNKLKSHSELRINVDVPTGSSRSNSLDIERLRHYMSSSGLMNGI-SPS-TALPQTQIS---APLIGQQATLLVL : 432  
 Ace-ACR-16 : KITYPALPLPLNKLKSHSELRINVDVPTGSSRSNSLEIERLRHYMSSSGLTNGV-SPPLTTLQSSQIT---APLIGQQATLLVL : 436  
 Cel-acr-16 : NITYASLPLPLNKLKSHSELRINVDVPTGSSRSNSLDADQLNQIMTQSVSNGL--TSLGSIPTMISSNGTTTIVSQQATLLVL : 436

### TM4

Asu-ACR-16 : QRIYQELKTIKRMIEADREGAQSNNWKFAPMVVDRCLCYVFTVFIVASSCGILL SAPYIIE\* : 503  
 Tca-ACR-16 : QRIYQELKTIKRMIEADREGTQSNWKFAPMVVDRCLCYVFTVFIVASSCGILL SAPYIIE- : 505  
 Llo-ACR-16 : QRIYQELKTIKRMMDAEKDDAKANNWKFAPMVVDRCLCYVFTVFIIVASSCGILL SAPYIIE- : 506  
 Hco-ACR-16 : QRIYQELKTIKRMMDAEKDDAKANNWKFAPMVVDRCLCYVFTVFIIVASSCGILL SAPYIIE- : 494  
 Ace-ACR-16 : QRIYQELKTIKRMMDAEKDDAKANNWKFAPMVVDRCLCYVFTVFIIVASSCGILL SAPYIIE- : 498  
 Cel-acr-16 : HRIYQELKTIKRMIEGDKKEQAQNNWKFAPMVVDRCLCYVFTVFIIVASSCGILL SAPYIIE- : 498

Figure 3S

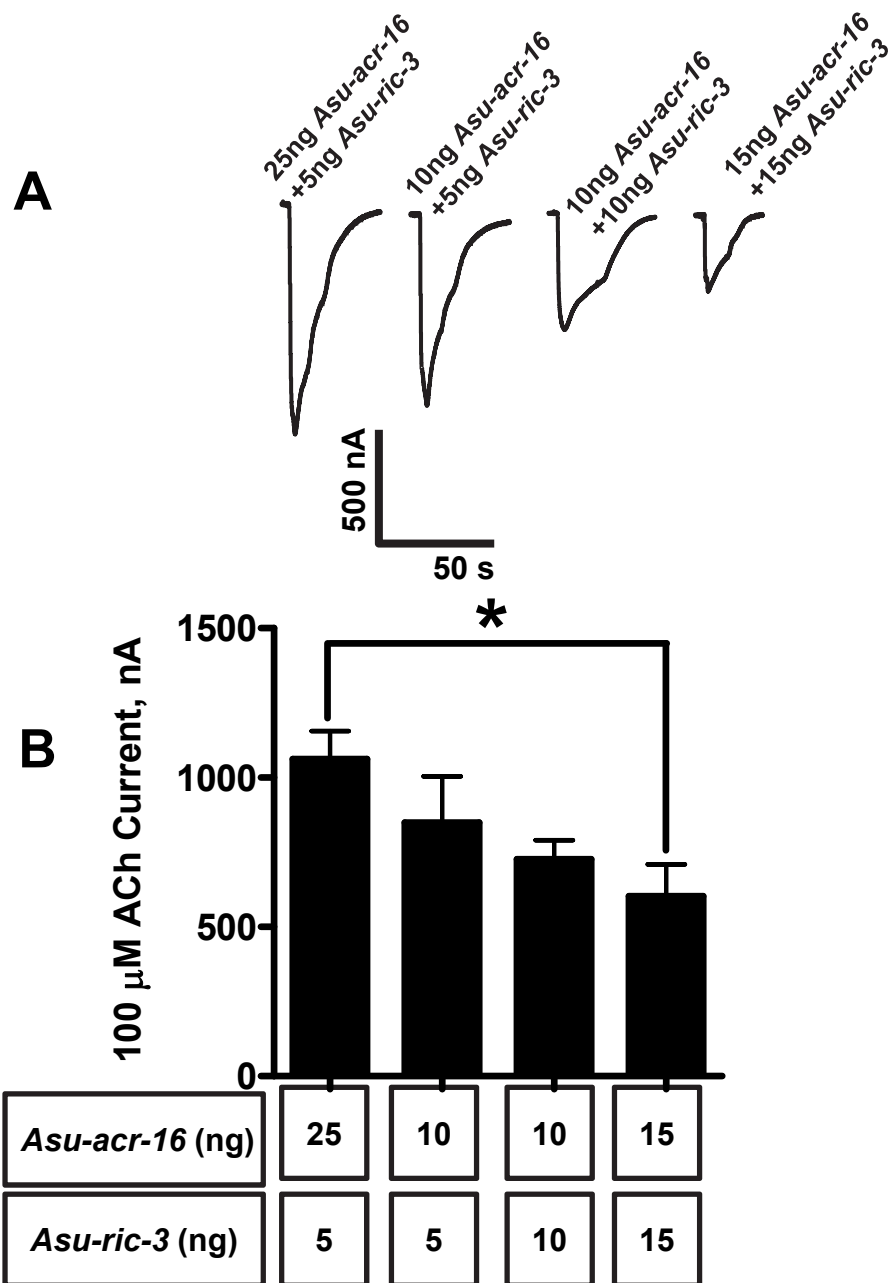

Figure 4S

A

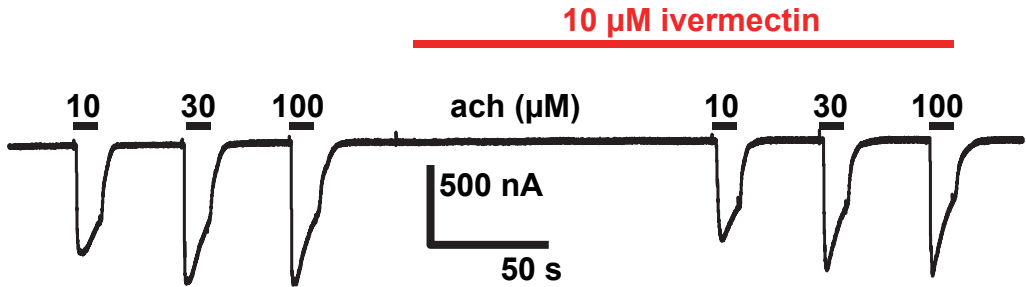

B

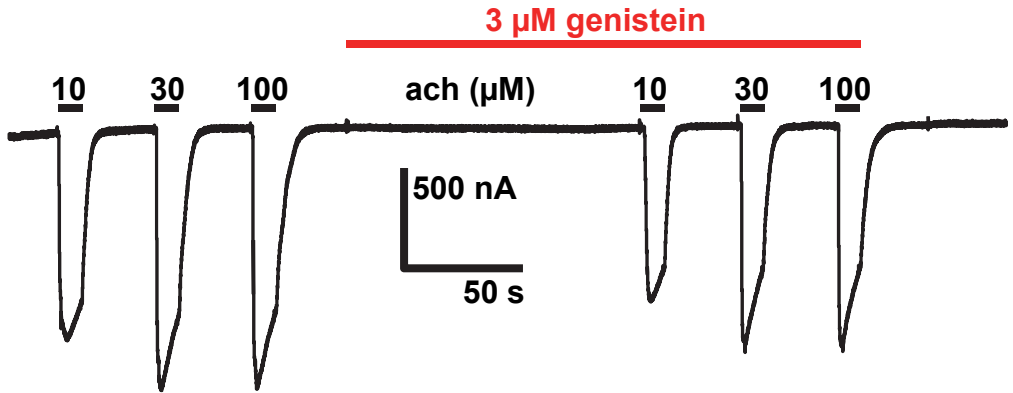

C

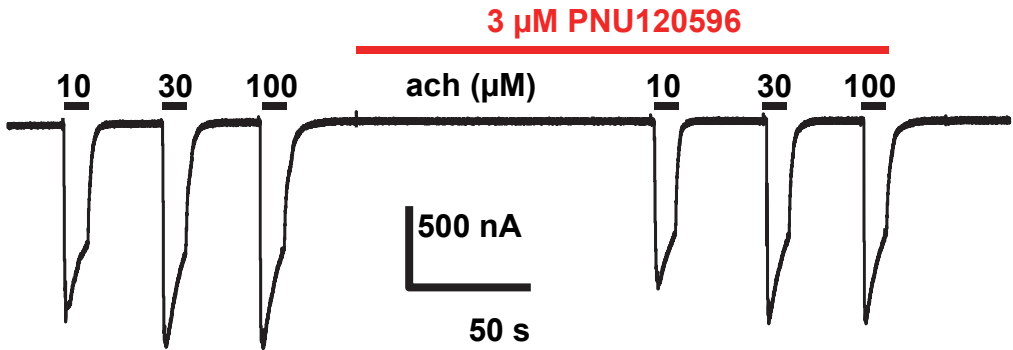

Figure 5S

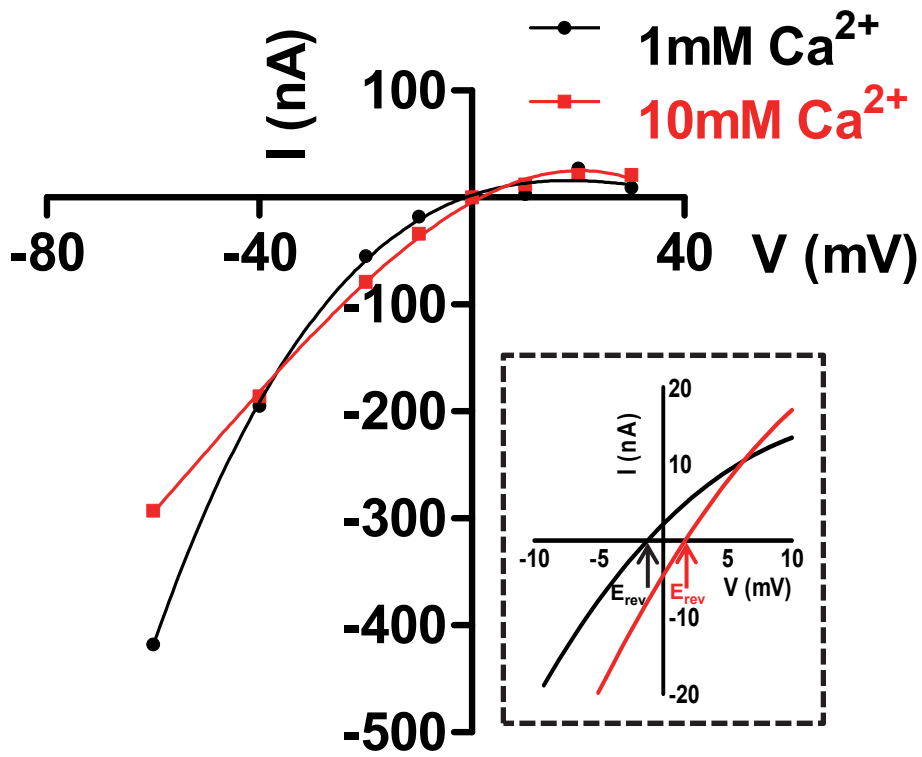

Supplement: BPH-173-2463-s002.pdf [file BPH-173-2463-s002.pdf]
