# Supplementary material for: Pharmacological profile of Ascaris suum ACR‐16, a new homomeric nicotinic acetylcholine receptor widely distributed in Ascaris tissues
Source: PubMed Central journal article supplement — Br J Pharmacol. 2016 Jul 18;173(16):2463–77. doi: 10.1111/bph.13524 (PMC4959957; doi:10.1111/bph.13524), 2016-07-18
Supplement: BPH-173-2463-s001.pdf [file BPH-173-2463-s001.pdf]

## Supplemental Figure Legends

**Figure 1S.** Amino acid sequence alignment of *A. suum* ACR-16 and *C. elegans* ACR-16 nAChR subunits. The signal peptide (bright green box), acetylcholine binding loops A – F (pink boxes), cys loop (yellow box) and transmembrane regions TM1 - TM4 (turquoise boxes) are indicated. The vicinal cysteines (black-edged box) that characterize an alpha ( $\alpha$ ) subunit are present in the C binding loop. The blue-edged box between TM2 and TM3 represents the region where PNU120596 acts on  $\alpha 7$ .

**Figure 2S.** Alignment of ACR-16 sequences from *Ascaris suum*, *Toxocara canis*, *Loa loa*, *Haemonchus contortus*, *Ancylostoma ceylanicum* and *Caenorhabditis elegans*. Predicted signal peptide sequences are shaded in grey. Amino acids conserved between the different ACR-16 sequences are highlighted in blue. The Cys-loop, the four transmembrane regions (TM1 - TM4) and the primary agonist binding site are noted above the sequence.

**Figure 3S.** Effects of varied amounts of *A. suum* *acr-16* and *A. suum* *ric-3* on *Asu*-ACR-16 expression. **A:** Sample traces represented as inward currents produced in response to 100  $\mu$ M acetylcholine. **B:** Bar chart (mean  $\pm$  S.E.M) showing current sizes produced by 25 ng *A. suum* *acr-16* and 5 ng *A. suum* *ric-3* ( $1062 \pm 94.1$ , n = 6), 10 ng *A. suum* *acr-16* and 5 ng *A. suum* *ric-3* ( $848.8 \pm 155.4$ , n = 6), 10 ng *A. suum* *acr-16* and 10 ng *A. suum* *ric-3* ( $727.3 \pm 63.1$ , n = 6); 15 ng *A. suum* *acr-16* and 15 ng *A. suum* *ric-3* ( $602.8 \pm 106.8$ , n = 6) in response to 100  $\mu$ M ach. \* represents p < 0.05 (Tukey multiple comparison tests).

**Figure 4S.** Sample traces showing the effects of positive allosteric modulators of  $\alpha 7$ ; **A:** 10  $\mu$ M ivermectin, **B:** 3  $\mu$ M genistein, and **C:** 3  $\mu$ M PNU120596, on *Asu*-ACR-16 mediated acetylcholine responses.

**Figure 5S.** Calcium permeability of *Asu*-ACR-16 with 30  $\mu$ M acetylcholine currents: Representative current-voltage (I-V) plot for oocytes expressing *Asu*-ACR-16, showing current change with voltage in 1 mM (black line) and 10 mM (red line)  $\text{Ca}^{2+}$  recording solutions. I-V relationship was plotted using a cubic polynomial equation and interpolated to measure the  $E_{\text{rev}}$ . The mean  $\pm$  S.E for the positive shift of the I-V plot for 6 observations was  $2.4 \pm 2.1$  mV, and this corresponded to a relative calcium permeability ratio of 0.4. Insert: magnified view of the I-V fitted line from -10 mV to 10 mV showing the  $E_{\text{rev}}$  in 1 mM and 10 mM  $\text{Ca}^{2+}$ .
